# Supplementary material
Source: publisher figshare collection journal article supplement (https://acs.figshare.com/ndownloader/files/20574906)
Supplement: Supplementary file 1 [file 20574906]

## Sheet: Sheet1
Supporting Information
Identifying vitamin E biosynthesis genes in Elaeis guineensis by genome-wide association study
Tingting Luo3*, Wei Xia2*, Shufang Gong1*, Annaliese S. Mason4, Zhiying Li1,5 , Rui Liu1, Yajing Dou1, Wenqi Tang1, Haikuo Fan1&, Chunyu Zhang3, Yong Xiao1,5&
1 Coconut Research Institute, Chinese Academy of Tropical Agricultural sciences, Wenchang, P.R. China 2 Hainan Key Laboratory for Sustainable Utilization of Tropical Bioresources, College of tropical crops, Hainan University, Haikou, 570228, P.R China 3 National Research Center of Rapeseed Engineering and Technology, College of Plant Science and Technology, Huazhong Agricultural University, Wuhan…
*These authors have equal contribution to the manuscript &Corresponding authors: Coconut Research Institute, Chinese Academy of Tropical Agricultural sciences, Wenchang, P.R. China Email: xiaoyong1980@catas.cn and vanheco@163.com Tel: +0086089863330470
Supplementary Tables
Supplementary Table 1 the detailed information and their vitamin E content of 161 oil palm individuals
Supplementary Table 2 P value of SNP markers significantly associated with tocotrienols, tocopherol and total vitamine E content
Supplementary Table 3 Chloroplast-related candidate genes
Supplementary Table 4 The RPKM value of 18 candidtae genes in different tissues
Supplementary Table 1 the detailed information and their vitamin E content of 161 oil palm individuals
No.	Position	Latitute	Longitude	Tree age	Origin	α-tocotrienols		δ-tocotrienols		γ-tocotrienols		α-tocopherol		total-tocotrienols		total-VE
						Mean	standard deviation	Mean	standard deviation	Mean	standard deviation	Mean	standard deviation	Mean	standard deviation	Mean	standard deviation
Cri1N-2	Wenchang city of Hainan province	19.53	110.76	Eight years	China	299.74	43.6518	271.177	10.442	483.318	34.4364	32.4751	8.40742	851.028	79.3578	883.503	77.3584
Cri2S-2	Wenchang city of Hainan province	19.53	110.76	Eight years	China	157.373	38.8023	54.1449	6.53758	226.189	36.2396	94.6991	32.631	576.596	47.7903	677.391	90.1863
Cri2S-3	Wenchang city of Hainan province	19.53	110.76	Eight years	China	207.651	73.5123	123.711	23.6489	235.886	46.9098	66.1637	66.8203	702.448	74.6376	768.612	96.6614
Cri3N-1	Wenchang city of Hainan province	19.53	110.76	Eight years	China	#N/A	#N/A	#N/A	#N/A	#N/A	#N/A	#N/A	#N/A	#N/A	#N/A	#N/A	#N/A
Cri4S-2	Wenchang city of Hainan province	19.53	110.76	Eight years	China	151.021	54.5705	53.104	15.2595	261.404	27.307	41.6799	10.6284	437.587	93.2839	479.267	90.7641
Cri4S-3	Wenchang city of Hainan province	19.53	110.76	Eight years	China	17.6304	53.1701	66.488	5.76969	213.456	20.3302	15.4629	12.623	365.02	62.6158	373.855	56.468
Cri5N-2	Wenchang city of Hainan province	19.53	110.76	Eight years	China	232.832	18.3084	92.9677	31.7714	262.016	23.3952	115.826	27.0131	781.366	63.8117	897.192	88.8793
Cri5S-1	Wenchang city of Hainan province	19.53	110.76	Eight years	China	#N/A	#N/A	#N/A	#N/A	#N/A	#N/A	#N/A	#N/A	#N/A	#N/A	#N/A	#N/A
Cri5S-2	Wenchang city of Hainan province	19.53	110.76	Eight years	China	189.355	39.4975	65.1558	5.96096	305.252	34.2713	25.0123	9.34242	480.009	76.9963	505.022	84.6154
Cri6S-1	Wenchang city of Hainan province	19.53	110.76	Eight years	China	341.926	23.8116	237.099	5.81649	451.67	17.9962	76.1595	22.7447	319.639	46.398	395.798	61.6076
Cri6S-3	Wenchang city of Hainan province	19.53	110.76	Eight years	China	401.765	44.8831	218.065	13.2121	423.737	25.5386	28.8523	7.23214	668.569	72.8041	697.422	76.0483
Cri7N-1	Wenchang city of Hainan province	19.53	110.76	Eight years	China	133.155	17.8115	22.3231	24.2058	202.846	28.3958	42.6435	26.1921	583.209	52.9674	625.853	77.1143
Cri7N-2	Wenchang city of Hainan province	19.53	110.76	Eight years	China	94.9761	8.76027	60.7192	26.5028	148.759	30.5388	8.45353	3.56608	321.516	64.397	329.969	67.4228
Cri7S-3	Wenchang city of Hainan province	19.53	110.76	Eight years	China	103.735	45.973	129.547	11.2893	360.061	34.7197	42.1094	11.2083	488.779	89.4337	530.888	99.4918
Cri8S-1	Wenchang city of Hainan province	19.53	110.76	Eight years	China	101.76	31.6333	78.0287	18.1276	148.262	37.4614	23.2227	15.4742	830.551	83.8039	853.773	96.1191
Cri8S-2	Wenchang city of Hainan province	19.53	110.76	Eight years	China	#N/A	#N/A	#N/A	#N/A	#N/A	#N/A	#N/A	#N/A	#N/A	#N/A	#N/A	#N/A
Cri8S-3	Wenchang city of Hainan province	19.53	110.76	Eight years	China	#N/A	#N/A	#N/A	#N/A	#N/A	#N/A	#N/A	#N/A	#N/A	#N/A	#N/A	#N/A
Cri8S-4	Wenchang city of Hainan province	19.53	110.76	Eight years	China	269.655	17.2188	65.1387	46.7037	330.998	52.1524	103.199	19.7681	626.597	79.6438	729.796	92.7442
Cri9N-1	Wenchang city of Hainan province	19.53	110.76	Eight years	China	#N/A	#N/A	#N/A	#N/A	#N/A	#N/A	#N/A	#N/A	#N/A	#N/A	#N/A	#N/A
Cri9S-1	Wenchang city of Hainan province	19.53	110.76	Eight years	China	156.04	46.1323	139.613	36.2978	307.471	35.3072	74.7838	33.9646	1102.54	102.362	1177.32	99.3187
Cri9S-2	Wenchang city of Hainan province	19.53	110.76	Eight years	China	240.093	25.212	210.265	35.8721	362.748	31.9908	29.9192	6.8045	827.23	80.2904	857.149	85.6765
Cri9S-3	Wenchang city of Hainan province	19.53	110.76	Eight years	Malaysia	260.959	48.521	117.342	15.167	295.172	38.9533	11.2025	2.88595	557.605	50.9045	568.807	49.6646
Cri8S-5	Wenchang city of Hainan province	19.53	110.76	Eight years	Malaysia	#N/A	#N/A	#N/A	#N/A	#N/A	#N/A	#N/A	#N/A	#N/A	#N/A	#N/A	#N/A
Cri10S-2	Wenchang city of Hainan province	19.53	110.76	Eight years	Malaysia	42.6747	20.3817	86.8739	37.1233	153.293	35.2343	46.9507	9.19838	947.899	76.6549	994.85	70.3033
Cri10S-3	Wenchang city of Hainan province	19.53	110.76	Eight years	Malaysia	164.949	24.3676	113.225	28.249	259.911	18.4517	102.282	19.9922	929.491	54.1093	1031.77	71.0821
Cri11N-1	Wenchang city of Hainan province	19.53	110.76	Eight years	Malaysia	107.666	41.9492	43.5931	33.2176	182.65	38.4307	64.364	1.94012	921.511	30.3154	985.875	28.5124
Cri11S-1	Wenchang city of Hainan province	19.53	110.76	Eight years	Malaysia	134.824	32.2033	216.401	18.8893	432.153	46.6202	97.4198	17.7543	944.783	87.4198	1058.79	86.2969
Cri11S-2	Wenchang city of Hainan province	19.53	110.76	Eight years	Malaysia	216.695	26.2759	29.7912	38.6372	204.733	31.1905	25.6488	10.0165	653.792	78.5933	679.441	86.056
Cri11S-3	Wenchang city of Hainan province	19.53	110.76	Eight years	Malaysia	140.041	47.7831	35.6381	28.154	233.236	43.8896	119.621	17.4512	1060.95	82.5674	1180.57	97.1108
Cri11S-4	Wenchang city of Hainan province	19.53	110.76	Eight years	Malaysia	456.633	20.882	63.2213	37.7527	331.174	29	39.1774	10.3549	679.994	86.5203	719.171	96.458
Cri11S-5	Wenchang city of Hainan province	19.53	110.76	Eight years	Malaysia	#N/A	#N/A	#N/A	#N/A	#N/A	#N/A	#N/A	#N/A	#N/A	#N/A	#N/A	#N/A
Cri11S-6	Wenchang city of Hainan province	19.53	110.76	Eight years	Malaysia	171.691	20.687	69.0172	18.4396	271.734	22.9976	105.485	24.5211	768.192	56.7726	873.676	65.4104
Cri11S-7	Wenchang city of Hainan province	19.53	110.76	Eight years	Malaysia	178.258	19.681	64.1035	27.7754	172.376	22.9914	85.6253	11.1553	1004.06	53.8136	1089.69	64.8164
Cri11S-8	Wenchang city of Hainan province	19.53	110.76	Eight years	Malaysia	#N/A	#N/A	#N/A	#N/A	#N/A	#N/A	#N/A	#N/A	#N/A	#N/A	#N/A	#N/A
Cri11S-10	Wenchang city of Hainan province	19.53	110.76	Eight years	Malaysia	134.928	27.3638	120.171	21.9997	329.257	36.044	36.3348	18.3682	773.384	73.6176	809.718	87.2169
Cri11S-11	Wenchang city of Hainan province	19.53	110.76	Eight years	Malaysia	238.862	8.91329	181.208	41.4765	442.886	61.0512	135.85	27.4885	903.714	109.056	1039.56	83.2925
Cri11S-12	Wenchang city of Hainan province	19.53	110.76	Eight years	Malaysia	122.165	34.5291	51.9574	21.8723	207.665	38.2415	26.3452	11.3932	481.897	87.7184	508.242	95.8489
Cri11S-13	Wenchang city of Hainan province	19.53	110.76	Eight years	Malaysia	192.429	0	138.742	32.6682	304.26	45.5959	24.6945	9.51685	751.962	74.4849	776.657	78.2751
Cri11S-15	Wenchang city of Hainan province	19.53	110.76	Eight years	Malaysia	41.6939	23.2723	19.3443	13.2872	106.663	59.2937	38.4801	36.2514	206.835	75.0166	245.315	61.0093
Cri11S-16	Wenchang city of Hainan province	19.53	110.76	Eight years	Malaysia	203.689	17.774	125.598	30.9615	302.467	40.613	90.1047	14.6625	996.789	83.5283	1086.89	96.1547
Cri11S-18	Wenchang city of Hainan province	19.53	110.76	Eight years	Malaysia	155.367	39.7634	160.673	7.63284	329.409	30.5844	24.2024	13.9903	408.915	75.3049	433.117	86.959
Cri11S-19	Wenchang city of Hainan province	19.53	110.76	Eight years	Malaysia	254.856	53.061	65.6272	19.8706	262.525	51.9046	17.9613	10.3816	750.511	91.298	768.472	98.7526
Cri12N-1	Wenchang city of Hainan province	19.53	110.76	Eight years	Malaysia	105.773	29.8913	100.192	25.9225	188.429	38.1514	0	2.94122	597.627	86.0649	597.627	86.2043
Cri12S-1	Wenchang city of Hainan province	19.53	110.76	Eight years	Malaysia	209.034	8.37183	196.435	10.408	382.27	21.9463	47.5657	9.92891	549.28	36.3955	596.845	46.2907
Cri12S-2	Wenchang city of Hainan province	19.53	110.76	Eight years	Malaysia	#N/A	#N/A	#N/A	#N/A	#N/A	#N/A	#N/A	#N/A	#N/A	#N/A	#N/A	#N/A
Cri12S-3	Wenchang city of Hainan province	19.53	110.76	Eight years	Malaysia	120.943	25.3082	158.084	27.1516	406.373	36.2388	32.8631	10.303	552.982	86.1528	585.845	96.1095
Cri12S-4	Wenchang city of Hainan province	19.53	110.76	Eight years	Malaysia	190.021	74.9161	201.494	27.6635	342.125	40.3826	47.7378	12.7791	672.518	81.8273	720.256	92.6969
Cri12S-5	Wenchang city of Hainan province	19.53	110.76	Eight years	Malaysia	341.088	33.287	168.317	12.8225	382.398	31.3519	20.908	16.6879	567.248	73.6502	588.156	90.3366
Cri12S-6	Wenchang city of Hainan province	19.53	110.76	Eight years	Malaysia	118.711	15.6495	89.7041	15.0094	362.976	15.6622	94.9537	22.8809	814.671	34.2896	909.625	44.2528
Cri12S-7	Wenchang city of Hainan province	19.53	110.76	Eight years	Malaysia	106.42	19.6513	154.892	17.4843	311.495	38.281	51.4754	22.6549	571.392	66.9461	622.867	88.9258
Cri12S-8	Wenchang city of Hainan province	19.53	110.76	Eight years	Malaysia	142.831	15.7738	28.0788	19.9508	133.74	27.5362	63.944	7.95851	904.242	45.1928	968.186	45.6166
Cri12S-9	Wenchang city of Hainan province	19.53	110.76	Eight years	Malaysia	#N/A	#N/A	#N/A	#N/A	#N/A	#N/A	#N/A	#N/A	#N/A	#N/A	#N/A	#N/A
Cri12S-10	Wenchang city of Hainan province	19.53	110.76	Eight years	Malaysia	41.4134	22.6567	111.252	30.3352	168.85	43.3007	88.4646	14.6744	712.8	79.5275	801.264	88.2508
Cri12S-11	Wenchang city of Hainan province	19.53	110.76	Eight years	Malaysia	367.304	14.5798	289.894	46.3756	484.002	77.8068	14.8717	7.09327	525.479	92.272	540.35	96.5389
Cri12S-12	Wenchang city of Hainan province	19.53	110.76	Eight years	Malaysia	127.61	47.0558	73.7673	60.305	216.788	48.3988	5.77612	3.77551	460.259	92.0866	463.559	91.6918
Cri12S-13	Wenchang city of Hainan province	19.53	110.76	Eight years	Malaysia	84.3292	48.2684	79.6215	18.9546	141.975	24.0666	27.3639	18.5172	558.858	65.6069	586.222	81.6256
Cri12S-14	Wenchang city of Hainan province	19.53	110.76	Eight years	Malaysia	149.956	26.3844	45.6076	27.3042	234.752	44.4585	59.8919	7.64549	875.368	90.0738	935.26	94.1491
Cri12S-15	Wenchang city of Hainan province	19.53	110.76	Eight years	Malaysia	190.89	19.6529	154.492	16.36	345.276	28.8305	64.6921	5.63282	862.956	35.8031	927.648	40.1063
Cri12S-16	Wenchang city of Hainan province	19.53	110.76	Eight years	Malaysia	240.953	29.0681	133.286	21.1904	317.373	31.2636	49.2157	21.5513	696.379	76.0731	745.594	87.7397
Cri12S-17	Wenchang city of Hainan province	19.53	110.76	Eight years	Malaysia	150.891	30.6958	72.7853	11.1274	203.787	44.6268	27.6451	13.2211	430.315	75.6361	448.911	85.3561
Cri12S-21	Wenchang city of Hainan province	19.53	110.76	Eight years	Malaysia	691.655	46.6709	45.1907	29.9366	466.475	40.5716	12.2029	7.45741	308.935	68.016	321.138	72.3479
Cri12S-22	Wenchang city of Hainan province	19.53	110.76	Eight years	Malaysia	265.716	105.033	154.114	47.185	313.417	79.4375	43.8371	22.7641	680.18	79.5671	724.017	80.7157
Cri12S-24	Wenchang city of Hainan province	19.53	110.76	Eight years	Malaysia	123.852	31.0866	164.948	21.2695	314.685	30.0927	78.2969	15.4466	1043.57	74.5253	1121.86	82.491
Cri12S-27	Wenchang city of Hainan province	19.53	110.76	Eight years	Malaysia	68.0966	48.1173	46.1237	1.77372	232.732	27.6178	55.9267	18.8805	765.151	75.5521	821.078	93.8941
Cri12S-28	Wenchang city of Hainan province	19.53	110.76	Eight years	Malaysia	178.655	58.7686	33.0481	13.3806	206.208	53.6107	6.72253	3.81392	364.69	98.6717	371.413	98.7891
Cri12S-30	Wenchang city of Hainan province	19.53	110.76	Eight years	Malaysia	212.882	33.3471	120.004	12.4849	265.286	39.2335	19.6446	12.3525	511.836	78.8342	531.481	84.5553
Cri12S-31	Wenchang city of Hainan province	19.53	110.76	Eight years	Malaysia	171.029	20.3647	88.4119	8.11162	410.113	24.7898	42.6784	19.4405	559.762	50.1161	590.404	62.8202
Cri13S-1	Wenchang city of Hainan province	19.53	110.76	Eight years	Malaysia	147.757	33.0859	194.652	40.918	328.225	58.6233	19.0653	16.4836	733.64	93.8529	749.528	83.3727
Cri13S-2	Wenchang city of Hainan province	19.53	110.76	Eight years	Malaysia	408.917	91.3497	30.0692	58.5293	326.165	56.0786	31.846	11.0308	869.583	87.8043	901.429	98.3076
Cri13S-3	Wenchang city of Hainan province	19.53	110.76	Eight years	Malaysia	245.795	19.9121	125.755	12.9859	312.782	39.9621	89.8833	28.2285	514.615	67.2651	604.499	71.8796
Cri13S-4	Wenchang city of Hainan province	19.53	110.76	Eight years	Malaysia	323.624	21.9121	151.433	34.991	355.493	31.0238	59.0492	15.8992	1054.23	85.5624	1113.28	98.1771
Cri13S-5	Wenchang city of Hainan province	19.53	110.76	Eight years	Malaysia	256.954	24.0378	51.5001	17.8836	309.088	20.929	51.5067	6.52657	936.887	61.8132	988.394	67.4042
Cri13S-6	Wenchang city of Hainan province	19.53	110.76	Eight years	Malaysia	234.809	19.063	200.257	8.46577	440.303	32.7673	38.6241	4.96008	775.384	58.7954	821.8	60.6359
Cri13S-8	Wenchang city of Hainan province	19.53	110.76	Eight years	Malaysia	183.579	65.2378	153.632	16.8049	335.328	28.0262	64.5759	8.98312	682.607	68.9976	747.183	68.5926
Cri13S-9	Wenchang city of Hainan province	19.53	110.76	Eight years	Malaysia	107.482	9.06943	33.2389	6.91206	232.881	11.1355	63.2845	12.1216	661.975	36.7049	725.259	49.6257
Cri13S-10	Wenchang city of Hainan province	19.53	110.76	Eight years	Malaysia	142.457	40.3898	14.7119	63.6731	197.234	85.2178	52.2078	20.2732	643.392	81.7586	673.225	88.513
Cri13S-12	Wenchang city of Hainan province	19.53	110.76	Eight years	Malaysia	313.41	0	77.8331	23.638	392.837	45.9017	11.6215	4.07076	439.202	61.9456	450.824	65.4378
Cri13S-13	Wenchang city of Hainan province	19.53	110.76	Eight years	Malaysia	152.203	11.4771	110.598	5.58193	219.096	13.2052	40.6192	4.66059	679.037	20.6797	719.656	24.5541
Cri13S-16	Wenchang city of Hainan province	19.53	110.76	Eight years	Malaysia	193.686	25.6168	84.9145	23.5016	188.278	40.2287	58.9627	22.077	1141.2	61.2735	1200.16	68.2922
Cri13S-20	Wenchang city of Hainan province	19.53	110.76	Eight years	Malaysia	268.424	19.5801	219.417	23.2941	468.702	35.0127	44.1892	4.6052	987.216	68.0069	1031.4	68.5902
Cri13S-21	Wenchang city of Hainan province	19.53	110.76	Eight years	Malaysia	#N/A	#N/A	#N/A	#N/A	#N/A	#N/A	#N/A	#N/A	#N/A	#N/A	#N/A	#N/A
Cri13S-22	Wenchang city of Hainan province	19.53	110.76	Eight years	Malaysia	176.913	27.5608	153.416	16.0147	267.298	30.9175	54.6556	12.9241	733.685	69.709	788.34	75.9646
Cri13S-24	Wenchang city of Hainan province	19.53	110.76	Eight years	Malaysia	248.507	29.0901	212.569	33.6202	405.06	44.6089	58.4004	6.98198	627.217	82.4777	685.617	87.4782
Cri14N-1	Wenchang city of Hainan province	19.53	110.76	Eight years	Malaysia	105.813	25.9563	101.715	34.9974	233.789	60.7448	105.653	41.5721	540.677	118.868	646.33	86.6676
Cri14N-2	Wenchang city of Hainan province	19.53	110.76	Eight years	Malaysia	#N/A	#N/A	#N/A	#N/A	#N/A	#N/A	#N/A	#N/A	#N/A	#N/A	#N/A	#N/A
Cri14S-1	Wenchang city of Hainan province	19.53	110.76	Eight years	Malaysia	255.535	44.4995	243.351	0	438.002	37.5126	24.4125	24.8267	338.539	81.5726	362.951	94.1535
Cri14S-2	Wenchang city of Hainan province	19.53	110.76	Eight years	Malaysia	173.177	39.4269	98.5982	16.7786	242.841	49.1267	43.9808	10.2225	494.626	51.2618	538.607	49.8918
Cri14S-4	Wenchang city of Hainan province	19.53	110.76	Eight years	Malaysia	171.003	26.557	0	21.6992	261.089	33.04	91.1375	13.5198	1056.26	78.8047	1147.4	90.4195
Cri14S-7	Wenchang city of Hainan province	19.53	110.76	Eight years	Malaysia	49.0453	27.0076	127.684	5.22073	283.529	27.5768	34.6921	9.2957	306.926	59.2093	341.618	65.28
Cri14S-9	Wenchang city of Hainan province	19.53	110.76	Eight years	Malaysia	250.817	51.3502	244.047	22.4514	509.2	45.2176	12.7376	3.75012	624.929	83.5403	637.666	84.2446
Cri14S-10	Wenchang city of Hainan province	19.53	110.76	Eight years	Malaysia	107.756	43.0395	48.005	36.3226	243.129	30.0658	13.7158	8.76636	459.672	55.038	473.388	58.7831
Cri14S-11	Wenchang city of Hainan province	19.53	110.76	Eight years	Malaysia	141.125	23.9693	113.766	27.7102	237.713	42.6138	17.969	4.77197	619.198	93.8922	637.167	97.8719
Cri14S-13	Wenchang city of Hainan province	19.53	110.76	Eight years	Malaysia	146.695	93.9991	142.416	15.6246	259.651	52.7268	30.735	9.7828	576.184	80.7749	602.528	88.4691
Cri14S-15	Wenchang city of Hainan province	19.53	110.76	Eight years	Malaysia	109.698	86.799	140.954	33.2431	250.243	80.0934	48.5721	27.1552	611.346	50.4591	659.918	69.7712
Cri14S-18	Wenchang city of Hainan province	19.53	110.76	Eight years	Malaysia	#N/A	#N/A	#N/A	#N/A	#N/A	#N/A	#N/A	#N/A	#N/A	#N/A	#N/A	#N/A
Cri14S-19	Wenchang city of Hainan province	19.53	110.76	Eight years	Malaysia	152.237	45.2107	104.558	5.86914	203.754	29.6974	16.816	7.51593	352.301	72.8604	369.117	79.3926
Cri14S-20	Wenchang city of Hainan province	19.53	110.76	Eight years	Malaysia	128.482	19.7795	18.5187	17.6186	159.924	15.5776	54.6215	17.4806	691.612	45.982	746.233	60.2302
Cri14S-21	Wenchang city of Hainan province	19.53	110.76	Eight years	Malaysia	233.535	29.6385	255.303	9.07321	440.653	27.0467	17.0667	9.41462	298.054	64.0495	308.605	69.5866
Cri15N-1	Wenchang city of Hainan province	19.53	110.76	Eight years	Malaysia	326.736	41.7776	125.555	19.4911	451.952	37.5286	12.6176	4.4683	459.523	95.0123	472.141	98.8403
Cri15N-2	Wenchang city of Hainan province	19.53	110.76	Eight years	Malaysia	99.0802	21.2875	108.999	15.5889	738.744	33.0746	52.3472	9.5417	940.498	68.9511	992.845	76.2198
Cri15N-3	Wenchang city of Hainan province	19.53	110.76	Eight years	Malaysia	96.8945	24.8425	35.5413	7.09358	232.255	28.8701	33.4816	25.1559	500.894	53.2384	534.376	73.2823
Cri15S-1	Wenchang city of Hainan province	19.53	110.76	Eight years	Costa Rica	#N/A	#N/A	#N/A	#N/A	#N/A	#N/A	#N/A	#N/A	#N/A	#N/A	#N/A	#N/A
Cri15S-3	Wenchang city of Hainan province	19.53	110.76	Eight years	Costa Rica	179.454	20.569	68.7232	20.9237	208.296	31.3508	60.8844	17.9626	598.172	65.7064	659.056	73.8586
Cri15S-4	Wenchang city of Hainan province	19.53	110.76	Eight years	Costa Rica	#N/A	#N/A	#N/A	#N/A	#N/A	#N/A	#N/A	#N/A	#N/A	#N/A	#N/A	#N/A
Cri15S-5	Wenchang city of Hainan province	19.53	110.76	Eight years	Costa Rica	220.451	32.9106	109.157	12.9125	277.67	23.678	30.1333	7.28104	466.878	67.4979	497.011	73.295
Cri15S-6	Wenchang city of Hainan province	19.53	110.76	Eight years	Costa Rica	#N/A	#N/A	#N/A	#N/A	#N/A	#N/A	#N/A	#N/A	#N/A	#N/A	#N/A	#N/A
Cri15S-7	Wenchang city of Hainan province	19.53	110.76	Eight years	Costa Rica	263.046	42.1096	284.19	20.5489	509.025	37.6403	15.3381	12.7165	548.762	69.3799	564.1	70.3908
Cri15S-8	Wenchang city of Hainan province	19.53	110.76	Eight years	Costa Rica	260.432	25.3232	219.075	20.7806	460.991	36.8131	54.5972	15.7169	435.785	82.7493	490.382	92.3387
Cri15S-10	Wenchang city of Hainan province	19.53	110.76	Eight years	Costa Rica	#N/A	#N/A	#N/A	#N/A	#N/A	#N/A	#N/A	#N/A	#N/A	#N/A	#N/A	#N/A
Cri15S-12	Wenchang city of Hainan province	19.53	110.76	Eight years	Costa Rica	125.468	30.8185	102.143	18.9842	208.174	23.7155	86.3926	35.7696	492.604	56.5234	578.996	82.1486
Cri15S-13	Wenchang city of Hainan province	19.53	110.76	Eight years	Costa Rica	#N/A	#N/A	#N/A	#N/A	#N/A	#N/A	#N/A	#N/A	#N/A	#N/A	#N/A	#N/A
Cri15S-14	Wenchang city of Hainan province	19.53	110.76	Eight years	Costa Rica	170.921	46.3856	174.791	11.3541	367.087	35.0497	28.0155	9.22904	607.278	87.737	635.294	84.5083
Cri15S-15	Wenchang city of Hainan province	19.53	110.76	Eight years	Costa Rica	#N/A	#N/A	#N/A	#N/A	#N/A	#N/A	#N/A	#N/A	#N/A	#N/A	#N/A	#N/A
Cri15S-16	Wenchang city of Hainan province	19.53	110.76	Eight years	Costa Rica	#N/A	#N/A	#N/A	#N/A	#N/A	#N/A	#N/A	#N/A	#N/A	#N/A	#N/A	#N/A
Cri15S-17	Wenchang city of Hainan province	19.53	110.76	Eight years	Costa Rica	165.392	15.5062	179.629	6.89236	348.171	27.5063	35.0952	15.6909	221.197	47.0306	256.292	56.6023
Cri15S-18	Wenchang city of Hainan province	19.53	110.76	Eight years	Costa Rica	157.967	49.367	123.199	21.7695	268.114	19.5388	54.9783	14.4331	733.247	73.739	788.225	82.6972
Cri15S-19	Wenchang city of Hainan province	19.53	110.76	Eight years	Costa Rica	141.858	32.1083	33.6186	17.7886	122.578	33.9936	34.016	14.0532	328.051	75.0607	362.067	77.2353
Cri15S-20	Wenchang city of Hainan province	19.53	110.76	Eight years	Costa Rica	#N/A	#N/A	#N/A	#N/A	#N/A	#N/A	#N/A	#N/A	#N/A	#N/A	#N/A	#N/A
Cri15S-21	Wenchang city of Hainan province	19.53	110.76	Eight years	Costa Rica	0	0	0	0	217.091	45.4687	83.3119	28.6808	644.501	76.8604	727.813	99.0535
Cri15S-22	Wenchang city of Hainan province	19.53	110.76	Eight years	Costa Rica	177.081	36.1267	167.5	6.30364	337.059	33.9847	84.6429	25.6579	1203.32	67.8496	1287.96	88.1993
Cri16N-2	Wenchang city of Hainan province	19.53	110.76	Eight years	Costa Rica	251.658	27.2317	135.71	9.42845	380.824	36.3419	33.7832	10.2295	538.085	72.7063	571.868	81.3027
Cri16N-3	Wenchang city of Hainan province	19.53	110.76	Eight years	Costa Rica	190.023	30.5152	110.173	20.1591	337.287	29.4605	51.5758	7.44734	870.914	76.4027	922.49	80.0315
Cri16S-8	Wenchang city of Hainan province	19.53	110.76	Eight years	Costa Rica	#N/A	#N/A	#N/A	#N/A	#N/A	#N/A	#N/A	#N/A	#N/A	#N/A	#N/A	#N/A
Cri16S-9	Wenchang city of Hainan province	19.53	110.76	Eight years	Costa Rica	155.712	24.4401	130.737	29.2813	358.052	44.5538	95.7938	16.3468	891.803	93.5232	987.597	95.4278
Cri16S-12	Wenchang city of Hainan province	19.53	110.76	Eight years	Costa Rica	204.868	17.6586	209.265	14.0883	367.233	26.6657	25.3461	11.7871	282.842	55.605	308.188	67.2747
Cri16S-13	Wenchang city of Hainan province	19.53	110.76	Eight years	Costa Rica	249.847	42.0732	138.66	31.747	477.871	33.243	27.0018	10.6866	592.642	85.6712	619.643	93.9805
Cri16S-14	Wenchang city of Hainan province	19.53	110.76	Eight years	Costa Rica	#N/A	#N/A	#N/A	#N/A	#N/A	#N/A	#N/A	#N/A	#N/A	#N/A	#N/A	#N/A
Cri16S-15	Wenchang city of Hainan province	19.53	110.76	Eight years	Costa Rica	84.7857	26.4459	218.367	24.4286	350.64	25.2591	51.6718	20.9061	813.106	64.4474	859.232	77.9712
Cri16S-16	Wenchang city of Hainan province	19.53	110.76	Eight years	Costa Rica	202.083	29.0473	155.991	15.5046	259.104	42.447	54.9148	25.3521	327.049	64.3992	381.964	89.4722
Cri16S-18	Wenchang city of Hainan province	19.53	110.76	Eight years	Costa Rica	#N/A	#N/A	#N/A	#N/A	#N/A	#N/A	#N/A	#N/A	#N/A	#N/A	#N/A	#N/A
Cri16S-19	Wenchang city of Hainan province	19.53	110.76	Eight years	Costa Rica	213.302	23.8772	65.2958	12.4315	233.239	54.0955	0	0	681.64	88.0254	681.907	87.7906
Cri16S-21	Wenchang city of Hainan province	19.53	110.76	Eight years	Costa Rica	149.11	16.1517	69.3662	22.4182	159.702	47.8075	16.1351	8.00754	333.909	66.1478	350.044	63.767
Cri16S-22	Wenchang city of Hainan province	19.53	110.76	Eight years	Costa Rica	177.079	65.5506	145.018	21.5621	297.101	51.5159	21.9771	12.7048	502.29	80.0227	524.267	89.2488
Cri17N-1	Wenchang city of Hainan province	19.53	110.76	Eight years	Costa Rica	#N/A	#N/A	#N/A	#N/A	#N/A	#N/A	#N/A	#N/A	#N/A	#N/A	#N/A	#N/A
Cri17N-2	Wenchang city of Hainan province	19.53	110.76	Eight years	Costa Rica	#N/A	#N/A	#N/A	#N/A	#N/A	#N/A	#N/A	#N/A	#N/A	#N/A	#N/A	#N/A
Cri17N-3	Wenchang city of Hainan province	19.53	110.76	Eight years	Costa Rica	159.492	22.9756	64.1362	14.2935	214.744	22.2042	2.23783	1.13118	305.925	52.7817	306.565	53.2352
Cri17S-2	Wenchang city of Hainan province	19.53	110.76	Eight years	Costa Rica	210.122	12.9734	221.349	11.2507	395.759	28.0477	4.59062	2.62868	292.696	47.5821	294.226	47.4555
Cri17S-3	Wenchang city of Hainan province	19.53	110.76	Eight years	Costa Rica	#N/A	#N/A	#N/A	#N/A	#N/A	#N/A	#N/A	#N/A	#N/A	#N/A	#N/A	#N/A
Cri17S-5	Wenchang city of Hainan province	19.53	110.76	Eight years	Costa Rica	151.535	39.9026	136.704	19.6705	264.743	22.9835	4.23962	3.38674	460.55	81.9993	464.789	83.3604
Cri17S-6	Wenchang city of Hainan province	19.53	110.76	Eight years	Costa Rica	318.823	31.222	203.268	0	465.125	51.6317	18.8256	14.0017	432.092	77.1422	450.918	81.3799
Cri17S-7	Wenchang city of Hainan province	19.53	110.76	Eight years	Costa Rica	174.785	39.2423	149.663	4.84495	364.014	19.7948	10.0597	5.28129	182.771	60.9632	192.83	65.9723
Cri17S-12	Wenchang city of Hainan province	19.53	110.76	Eight years	Costa Rica	227.311	57.7987	78.9505	19.1913	213.652	28.9987	23.1528	8.2361	651.046	67.4268	674.199	74.4073
Cri17S-13	Wenchang city of Hainan province	19.53	110.76	Eight years	Costa Rica	#N/A	#N/A	#N/A	#N/A	#N/A	#N/A	#N/A	#N/A	#N/A	#N/A	#N/A	#N/A
Cri17S-14	Wenchang city of Hainan province	19.53	110.76	Eight years	Costa Rica	151.95	27.2093	82.7801	25.9025	288.942	33.877	21.3653	21.116	418.166	84.4286	439.531	99.6266
Cri17S-15	Wenchang city of Hainan province	19.53	110.76	Eight years	Costa Rica	#N/A	#N/A	#N/A	#N/A	#N/A	#N/A	#N/A	#N/A	#N/A	#N/A	#N/A	#N/A
Cri17S-18	Wenchang city of Hainan province	19.53	110.76	Eight years	Costa Rica	81.4241	58.2833	7.96203	11.6267	96.0386	29.1638	17.8609	11.9117	415.763	77.1516	433.624	87.2475
Cri17S-22	Wenchang city of Hainan province	19.53	110.76	Eight years	Costa Rica	59.4801	31.1502	26.7533	9.74023	134.964	19.7451	25.6273	13.4089	583.009	53.3672	608.636	58.4554
Cri17S-23	Wenchang city of Hainan province	19.53	110.76	Eight years	Costa Rica	133.542	26.19	82.8832	5.65136	194.243	12.4874	7.25484	4.38833	460.519	37.7974	467.774	41.3152
Cri18N-2	Wenchang city of Hainan province	19.53	110.76	Eight years	Costa Rica	#N/A	#N/A	#N/A	#N/A	#N/A	#N/A	#N/A	#N/A	#N/A	#N/A	#N/A	#N/A
Cri18N-3	Wenchang city of Hainan province	19.53	110.76	Eight years	Costa Rica	246.197	25.1394	121.365	15.0444	301.008	18.8824	0	0	478.521	76.0654	478.521	76.0654
Cri18N-4	Wenchang city of Hainan province	19.53	110.76	Eight years	Costa Rica	193.062	17.7154	63.4785	16.2972	232.238	19.6631	37.2069	6.03634	617.177	52.5984	654.384	57.7851
Cri18S-1	Wenchang city of Hainan province	19.53	110.76	Eight years	Costa Rica	153.71	26.3728	21.7458	17.4882	189.564	31.2236	22.4913	11.2711	394.395	72.7364	416.886	82.2011
Cri18S-2	Wenchang city of Hainan province	19.53	110.76	Eight years	Costa Rica	280.244	25.6419	255.89	11.885	408.65	39.1948	26.2422	8.99897	684.908	72.7226	711.15	77.1132
Cri18S-7	Wenchang city of Hainan province	19.53	110.76	Eight years	Costa Rica	164.715	47.6198	177.272	11.6876	342.922	22.3338	28.9489	16.8257	290.886	73.2506	319.835	88.3304
Cri18S-8	Wenchang city of Hainan province	19.53	110.76	Eight years	Costa Rica	56.0293	31.9313	19.3991	18.0696	131.407	29.525	23.7471	12.1713	474.831	69.2601	498.578	78.8377
Cri18S-6	Wenchang city of Hainan province	19.53	110.76	Eight years	Costa Rica	237.765	28.318	215.395	16.7879	391.417	20.9305	34.7673	5.52742	1005.95	82.2735	1040.72	87.0743
Cri18S-9	Wenchang city of Hainan province	19.53	110.76	Eight years	Costa Rica	191.619	22.6628	31.2002	20.7733	293.533	42.1807	42.6393	10.7798	910.752	80.1358	953.392	89.6785
Cri18S-11	Wenchang city of Hainan province	19.53	110.76	Eight years	Costa Rica	156.746	40.9292	134.127	11.9304	269.541	21.0292	42.8537	28.6499	414.737	72.7954	457.591	99.9884
Cri18S-12	Wenchang city of Hainan province	19.53	110.76	Eight years	Costa Rica	79.919	22.7555	29.4668	8.83576	119.841	20.4243	36.2175	14.8447	567.268	76.2366	630.899	92.7705
Cri18S-13	Wenchang city of Hainan province	19.53	110.76	Eight years	Costa Rica	147.985	35.2887	111.13	17.2616	215.715	27.1746	50.9724	17.6372	635.431	74.6308	686.403	87.1588
Cri18S-14	Wenchang city of Hainan province	19.53	110.76	Eight years	Costa Rica	#N/A	#N/A	#N/A	#N/A	#N/A	#N/A	#N/A	#N/A	#N/A	#N/A	#N/A	#N/A
Cri18S-16	Wenchang city of Hainan province	19.53	110.76	Eight years	Costa Rica	280.451	19.7129	285.529	9.68046	428.721	17.7968	45.2594	34.6902	519.913	42.798	565.173	76.727
Cri18S-18	Wenchang city of Hainan province	19.53	110.76	Eight years	Costa Rica	228.942	40.963	166.681	15.3561	300.756	31.0743	52.5632	22.0613	610.117	82.567	648.219	97.9033
Cri18S-20	Wenchang city of Hainan province	19.53	110.76	Eight years	Costa Rica	129.912	18.5231	202.319	7.78936	347.763	21.8099	8.8057	22.595	321.978	34.879	330.784	30.8655
Cri18S-21	Wenchang city of Hainan province	19.53	110.76	Eight years	Costa Rica	#N/A	#N/A	#N/A	#N/A	#N/A	#N/A	#N/A	#N/A	#N/A	#N/A	#N/A	#N/A
Cri18S-23	Wenchang city of Hainan province	19.53	110.76	Eight years	Costa Rica	#N/A	#N/A	#N/A	#N/A	#N/A	#N/A	#N/A	#N/A	#N/A	#N/A	#N/A	#N/A
Cri19N-1	Wenchang city of Hainan province	19.53	110.76	Eight years	Costa Rica	261.204	25.2456	80.5848	11.9338	360.66	32.0517	44.863	18.2998	512.442	67.0122	557.305	83.0243
Cri19N-2	Wenchang city of Hainan province	19.53	110.76	Eight years	Costa Rica	#N/A	#N/A	#N/A	#N/A	#N/A	#N/A	#N/A	#N/A	#N/A	#N/A	#N/A	#N/A
Cri19N-3	Wenchang city of Hainan province	19.53	110.76	Eight years	Costa Rica	183.376	34.9697	99.4415	24.3276	276.041	41.8134	28.7636	12.7442	631.754	90.7949	602.626	97.4626
Cri19N-5	Wenchang city of Hainan province	19.53	110.76	Eight years	Costa Rica	205.173	23.812	202.509	11.403	365.702	25.0175	12.5762	1.72265	730.192	50.8974	742.768	51.9295
Cri19S-1	Wenchang city of Hainan province	19.53	110.76	Eight years	Costa Rica	#N/A	#N/A	#N/A	#N/A	#N/A	#N/A	#N/A	#N/A	#N/A	#N/A	#N/A	#N/A
Cri20N-1	Wenchang city of Hainan province	19.53	110.76	Eight years	Costa Rica	26.721	#N/A	166.431	#N/A	266.52	#N/A	6.64657	#N/A	167.701	#N/A	172.449	#N/A
Cri20N-3	Wenchang city of Hainan province	19.53	110.76	Eight years	Costa Rica	166.642	28.5633	157.359	15.2197	268.641	51.012	30.768	6.66549	750.543	90.173	781.311	92.997
Cri20S-2	Wenchang city of Hainan province	19.53	110.76	Eight years	Costa Rica	236.549	71.6228	187.949	18.1788	479.215	81.6339	80.9144	36.6878	1007.99	69.4083	1088.91	87.0919
Cri20S-3	Wenchang city of Hainan province	19.53	110.76	Eight years	Costa Rica	5.15473	21.7656	189.797	5.4863	330.527	25.7013	81.4488	25.6951	437.707	47.8027	519.156	67.9071
Cri20S-6	Wenchang city of Hainan province	19.53	110.76	Eight years	Costa Rica	230.1	29.1274	159.901	15.7537	360.509	29.8635	78.56	12.8336	844.578	73.1115	923.138	63.707
Cri20S-10	Wenchang city of Hainan province	19.53	110.76	Eight years	Costa Rica	257.835	95.8373	71.4801	18.0837	211.362	130.153	162.873	30.1472	946.823	49.4151	1109.7	63.5165
Cri20S-11	Wenchang city of Hainan province	19.53	110.76	Eight years	Costa Rica	383.614	15.062	83.3743	15.179	407.648	25.5525	34.859	2.10996	872.608	82.7766	907.467	83.4112
Cri20S-13	Wenchang city of Hainan province	19.53	110.76	Eight years	Costa Rica	193.408	22.0222	136.444	18.9439	297.364	34.1511	22.0254	12.2109	410.669	73.1158	425.352	76.416
Cri20S-14	Wenchang city of Hainan province	19.53	110.76	Eight years	Costa Rica	167.107	28.9534	56.6187	13.8597	236.793	29.3511	97.2339	15.9316	665.792	69.2378	763.026	68.5627
Cri20S-17	Wenchang city of Hainan province	19.53	110.76	Eight years	Costa Rica	151.949	24.3338	30.1534	32.0816	236.227	40.837	45.4442	5.15059	603.123	84.8278	648.567	88.3744
Cri20S-19	Wenchang city of Hainan province	19.53	110.76	Eight years	Costa Rica	0	19.8929	258.436	10.4091	493.526	54.8444	65.2856	13.6805	516.352	79.8274	581.637	91.623
Cri20S-21	Wenchang city of Hainan province	19.53	110.76	Eight years	Costa Rica	133.624	31.2614	133.795	10.5418	314.319	32.0445	30.5911	13.9891	229.227	73.3595	259.818	82.1961
Cri20S-24	Wenchang city of Hainan province	19.53	110.76	Eight years	Costa Rica	0	#N/A	138.625	#N/A	300.577	#N/A	20.5193	#N/A	367.42	#N/A	381.099	#N/A
Cri20S-27	Wenchang city of Hainan province	19.53	110.76	Eight years	Costa Rica	#N/A	#N/A	#N/A	#N/A	#N/A	#N/A	#N/A	#N/A	#N/A	#N/A	#N/A	#N/A
Cri20S-29	Wenchang city of Hainan province	19.53	110.76	Eight years	Costa Rica	#N/A	#N/A	#N/A	#N/A	#N/A	#N/A	#N/A	#N/A	#N/A	#N/A	#N/A	#N/A
Cri20S-33	Wenchang city of Hainan province	19.53	110.76	Eight years	Costa Rica	#N/A	#N/A	#N/A	#N/A	#N/A	#N/A	#N/A	#N/A	#N/A	#N/A	#N/A	#N/A
Cri20S-35	Wenchang city of Hainan province	19.53	110.76	Eight years	Costa Rica	#N/A	#N/A	#N/A	#N/A	#N/A	#N/A	#N/A	#N/A	#N/A	#N/A	#N/A	#N/A
Cri20S-36	Wenchang city of Hainan province	19.53	110.76	Eight years	Costa Rica	#N/A	#N/A	#N/A	#N/A	#N/A	#N/A	#N/A	#N/A	#N/A	#N/A	#N/A	#N/A
Cri16S+4	Wenchang city of Hainan province	19.53	110.76	Eight years	Costa Rica	#N/A	#N/A	#N/A	#N/A	#N/A	#N/A	#N/A	#N/A	#N/A	#N/A	#N/A	#N/A
Cri17S+1	Wenchang city of Hainan province	19.53	110.76	Eight years	Costa Rica	#N/A	#N/A	#N/A	#N/A	#N/A	#N/A	#N/A	#N/A	#N/A	#N/A	#N/A	#N/A
Cri17S+2	Wenchang city of Hainan province	19.53	110.76	Eight years	Africa	256.082	35.751	163.474	9.55461	310.636	33.3551	13.996	8.99226	398.89	77.2813	412.886	86.0477
Cri17S+3	Wenchang city of Hainan province	19.53	110.76	Eight years	Africa	120.798	66.7433	35.5097	15.4977	165.67	42.4954	45.8339	36.1008	371.31	86.4345	440.883	84.6262
Cri18S+2	Wenchang city of Hainan province	19.53	110.76	Eight years	Africa	303.577	62.6409	212.467	27.4523	431.854	53.38	47.4156	12.6842	784.08	87.9437	839.862	99.1158
Cri18S+3	Wenchang city of Hainan province	19.53	110.76	Eight years	Africa	#N/A	#N/A	#N/A	#N/A	#N/A	#N/A	#N/A	#N/A	#N/A	#N/A	#N/A	#N/A
Cri18S+4	Wenchang city of Hainan province	19.53	110.76	Eight years	Africa	175.744	35.6381	85.9253	16.8554	333.987	30.6977	29.4747	9.33301	438.372	77.2408	467.847	81.2519
Cri18S+5	Wenchang city of Hainan province	19.53	110.76	Eight years	Africa	138.206	20.8097	32.2659	5.18424	196.948	26.4716	22.0333	3.70347	537.486	64.1506	559.519	65.7365
Cri19S+1	Wenchang city of Hainan province	19.53	110.76	Eight years	Africa	223.731	27.6771	240.418	31.6789	532.641	47.2483	18.865	11.693	645.449	97.157	664.314	94.8503
Cri19S+2	Wenchang city of Hainan province	19.53	110.76	Eight years	Africa	64.2033	46.6756	56.6953	8.4564	171.797	43.4594	8.11546	4.95091	418.329	90.6517	426.445	93.3675
Cri20S+1	Wenchang city of Hainan province	19.53	110.76	Eight years	Africa	284.896	78.7311	198.225	31.7521	362.614	29.991	22.1774	19.6246	587.815	87.9309	603.443	82.0734
Supplementary Table 2 P value of SNP markers significantly associated with tocotrienols, tocopherol and total vitamine E content
Chr	Position	α-tocotrienols	δ-tocotrienols	γ-tocotrienols	α-tocopherol	total tocotrienols	total vitamin E
Chr1	37847654		2.01627e-08
Chr1	324869			9.87943e-08
Chr1	22231718					4.35854e-10
Chr10	20944601	3.98e-10
Chr11	18009334	1.27689e-08	1.27689e-08
Chr11	7353680				1.48949e-08
Chr11	6107488						3.67636e-11
Chr12	16890208	1.48362e-07	1.48362e-07
Chr12	4592899				2.62625e-08
Chr12	23696562				1.45762e-07
Chr13	7035767	1.36179e-10	1.36179e-10
Chr13	15020094	3.77587e-08	3.77587e-08
Chr14	3768399			1.64436e-08
Chr14	12133685				2.86157e-07
Chr14	18610515					2.36026e-12
Chr15	11984142					11984142
Chr15	15258457				6.65497e-11
Chr15	4733438					2.2659e-09
Chr16	20695880			4.85e-08
Chr16	15161861	3.339e-10	3.339e-10
Chr16	9113135					6.24847e-10
Chr2	30561604			9.89e-09
Chr2	5272307			2.07323e-08			3.15718e-08
Chr2	62018091			2.98285e-07
Chr2	59931726				2.68889e-10
Chr2	60218322					4.04088e-07
Chr2	5272307			2.07323e-08			3.15718e-08
Chr2	15826497						1.02156e-07
Chr3	20307366	6.86337e-10	6.86337e-10
Chr3	1308122			4.98986e-09
Chr4	23391605	4.14377e-15	4.14377e-15
Chr4	37371942				4.36472e-16
Chr4	51123599				6.1641e-08
Chr4	12531744						5.78558e-09
Chr5	7911436	5.72e-08
Chr5	9822178						4.1674e-07
Chr6	8220209			1.28e-12
Chr6	2436555	1.28e-12		4.61047e-08
Chr7	19872880	3.35e-08
Chr7	13140416			2.33809e-09			1.55102e-07
Chr7	1884171					2.50642e-10
Chr7	13140416			2.33809e-09			1.55102e-07
Chr8	36782849		3.16396e-07
Chr8	23453457			1.74698e-09
Chr9	1431612				5.24311e-09
Chr9	18353771				6.63682e-09
Chr9	37723075					1.57221e-09
Supplementary Table 3 Chloroplast-related candidate genes
Gene ID	Protein ID	Functional annotation
LOC105032708	XP_010905531.1	peptidyl-prolyl cis-trans isomerase CYP37
LOC105033414	XP_010906509.1	photosystem II 10 kDa polypeptide, chloroplastic
LOC105033957	XP_010907248.1	chloroplast stem-loop binding protein of 41 kDa a, chloroplastic
LOC105037047	XP_010911060.1	proteinaceous RNase P 1, chloroplastic/mitochondrial
LOC105038869	XP_010913088.1	chaperone protein dnaJ 20, chloroplastic-like
LOC105039369	XP_010913815.2	ATP-dependent zinc metalloprotease FTSH 9, chloroplastic/mitochondrial
LOC105039909	XP_010914531.2	phosphoribosylformylglycinamidine cyclo-ligase, chloroplastic/mitochondria
LOC105041288	XP_010916492.1	RHOMBOID-like protein 9, chloroplastic isoform X3
LOC105041290	XP_010916495.1	protein PTST, chloroplastic isoform X1
LOC105041300	XP_010916509.1	peptidyl-prolyl cis-trans isomerase FKBP17-2, chloroplastic
LOC105041313	XP_010916535.1	protein FAF-like, chloroplastic isoform X1
LOC105041319	XP_010916545.1	30S ribosomal protein S13, chloroplastic
LOC105041385	XP_010916650.1	probable inactive heme oxygenase 2, chloroplastic
LOC105041388	XP_010916652.1	uroporphyrinogen-III synthase, chloroplastic
LOC105041394	XP_010916662.1	serine--tRNA ligase, chloroplastic/mitochondrial isoform X1
LOC105041406	XP_010916678.1	protein CutA 1, chloroplastic
LOC105041408	XP_010916680.1	ATP-dependent 6-phosphofructokinase 5, chloroplastic-like
LOC105041791	XP_010917120.1	pentatricopeptide repeat-containing protein DOT4, chloroplastic-like
LOC105041954	XP_010917331.1	protein FATTY ACID EXPORT 2, chloroplastic
LOC105042023	XP_010917427.1	peroxiredoxin Q, chloroplastic
LOC105042027	XP_010917434.1	3-oxoacyl-[acyl-carrier-protein synthase I, chloroplastic-like
LOC105042230	XP_010917651.1	sec-independent protein translocase protein TATA, chloroplastic isoform X1
LOC105043314	XP_010919115.1	beta-carotene 3-hydroxylase 2, chloroplastic-like
LOC105043318	XP_010919124.2	2-C-methyl-D-erythritol 2,4-cyclodiphosphate synthase, chloroplastic
LOC105043745	XP_010919726.1	protein VASCULAR ASSOCIATED DEATH 1, chloroplastic isoform X1
LOC105043748	XP_010919735.1	phospholipase A1-Ibeta2, chloroplastic
LOC105044145	XP_010920252.1	hexokinase-2, chloroplastic
LOC105044954	XP_010921365.1	glucose-6-phosphate 1-dehydrogenase 4, chloroplastic
LOC105045501	XP_010922101.1	ribonuclease III domain-containing protein RNC1, chloroplastic
LOC105045804	XP_010922505.2	pentatricopeptide repeat-containing protein At3g09650, chloroplastic-like
LOC105046259	XP_010923100.1	probable anion transporter 1, chloroplastic isoform X2
LOC105046370	XP_010923239.1	ribulose bisphosphate carboxylase/oxygenase activase 2, chloroplastic
LOC105046840	XP_010923878.1	methionine aminopeptidase 1B, chloroplastic
LOC105048510	XP_010926127.1	50S ribosomal protein L15, chloroplastic isoform X1
LOC105048679	XP_010926377.1	pentatricopeptide repeat-containing protein DOT4, chloroplastic-like
LOC105048984	XP_010926812.1	glucose-6-phosphate 1-dehydrogenase, chloroplastic-like isoform X1
LOC105048988	XP_010926819.1	50S ribosomal protein L27, chloroplastic isoform X2
LOC105049016	XP_010926853.2	palmitoyl-acyl carrier protein thioesterase, chloroplastic-like
LOC105050571	XP_010928956.1	heme-binding-like protein At3g10130, chloroplastic
LOC105050613	XP_010928994.1	APO protein 1, chloroplastic
LOC105050906	XP_010929433.1	pentatricopeptide repeat-containing protein At5g52850, chloroplastic
LOC105051456	XP_010930216.1	uncharacterized CRM domain-containing protein At3g25440, chloroplastic
LOC105052107	XP_010931118.1	probable pyruvate, phosphate dikinase regulatory protein, chloroplastic
LOC105052116	XP_010931130.1	probable pyruvate, phosphate dikinase regulatory protein, chloroplastic
LOC105052482	XP_010931607.1	peptide chain release factor APG3, chloroplastic isoform X2
LOC105052637	XP_010931815.1	glucose-6-phosphate/phosphate translocator 2, chloroplastic
LOC105052655	XP_010931851.1	pentatricopeptide repeat-containing protein At5g50390, chloroplastic
LOC105052661	XP_010931860.1	50S ribosomal protein L24, chloroplastic isoform X1
LOC105053239	XP_010932636.1	glutathione S-transferase DHAR3, chloroplastic
LOC105053244	XP_010932642.1	probable fructokinase-6, chloroplastic
LOC105053995	XP_010933663.1	protein NUCLEAR FUSION DEFECTIVE 6, chloroplastic/mitochondrial
LOC105054140	XP_010933882.1	dihydrodipicolinate reductase-like protein CRR1, chloroplastic isoform X2
LOC105054141	XP_010933883.1	protein COFACTOR ASSEMBLY OF COMPLEX C SUBUNIT B CCB2, chloroplastic
LOC105054820	XP_010934718.1	K(+) efflux antiporter 2, chloroplastic-like
LOC105055193	XP_010935243.1	protein DETOXIFICATION 45, chloroplastic
LOC105055201	XP_010935254.1	1,4-alpha-glucan-branching enzyme, chloroplastic/amyloplastic-like
LOC105056344	XP_010936813.1	ATP-dependent DNA helicase homolog RECG, chloroplastic
LOC105056629	XP_010937192.1	photosynthetic NDH subunit of subcomplex B 4, chloroplastic
LOC105056821	XP_010937450.1	copper-transporting ATPase PAA1, chloroplastic
LOC105056825	XP_010937454.1	photosystem II reaction center W protein, chloroplastic-like
LOC105057003	XP_010937725.1	protein SLOW GREEN 1, chloroplastic-like
LOC105057042	XP_010937787.1	LOW QUALITY PROTEIN: fructokinase-like 2, chloroplastic
LOC105057354	XP_010938262.1	LOW QUALITY PROTEIN: probable glutamyl endopeptidase, chloroplastic
LOC105058068	XP_010939149.1	biotin carboxyl carrier protein of acetyl-CoA carboxylase, chloroplastic
LOC105058085	XP_010939179.1	phosphoserine phosphatase, chloroplastic
LOC105058128	XP_010939239.1	glucose-6-phosphate 1-dehydrogenase, chloroplastic isoform X1
LOC105058406	XP_010939632.1	putative pumilio homolog 7, chloroplastic
LOC105059151	XP_010940674.1	GDT1-like protein 2, chloroplastic
LOC105059677	XP_010941376.1	rhodanese-like domain-containing protein 15, chloroplastic
LOC105050238	XP_019703830.1	pentatricopeptide repeat-containing protein At4g18975, chloroplastic
LOC105038429	XP_019704327.1	probable L-ascorbate peroxidase 6, chloroplastic
LOC105046297	XP_019705856.1	probable amino-acid acetyltransferase NAGS1, chloroplastic is guineen
LOC105045803	XP_019706241.1	pentatricopeptide repeat-containing protein At3g09650, chloroplastic-like
LOC105051625	XP_019708565.1	uncharacterized CRM domain-containing protein At3g25440, chloroplastic
LOC105053368	XP_019708585.1	transcription termination factor MTERF4, chloroplastic
LOC105051097	XP_019709534.1	arogenate dehydratase/prephenate dehydratase 1, chloroplastic-like
LOC105056630	XP_019710037.1	photosynthetic NDH subunit of lumenal location 2, chloroplastic-like
LOC105059085	XP_019710997.1	sec-independent protein translocase protein TATB, chloroplastic-like
Supplementary Table 4 The RPKM value of 18 candidtae genes in different tissues
	Mesocarp 10 Weeks after anthesis	Mesocarp 15 Weeks after anthesis	mesocarp 17 weeks	mesocarp 19 weeks	mesocarp 21 weeks	mesocarp 23 weeks	Kernel 10 Weeks after anthesis	Kernel 15 Weeks after anthesis	Spear leaf dura	Pollen pisifera sterile	Female flower 2.5cm	Shoot apex	Floret before anthesis dura	Roots from seedling plants	Predicted function
LOC105052944	2.31331	24.2866	47.8182	126.481	233.164	26.4651	0.966152	0.001	0.001	3.94066	0.001	0.001	0.001	0.001	homogentisate geranylgeranyl transferase (HGGT)
LOC105041288	9.60148	1.96966	9.13715	11.0169	4.43438	2.64703	0.001	2.46788	10.8603	0.001	1.11842	3.35849	1.09915	0.001	RHOMBOID-like protein 9, chloroplastic isoform X3
LOC105044145	1.77241	11.8168	0.001	4.59793	3.04043	7.1463	0.001	0.001	5.58479	0.001	9.39384	2.68654	6.59429	3.7617	hexokinase-2, chloroplastic
LOC105056821	0.001	13.5262	9.00677	8.97106	7.90962	7.43639	3.83664	6.16276	3.39003	0.001	0.001	0.698898	2.05859	5.38229	copper-transporting ATPase PAA1, chloroplastic
LOC105039492	0.507064	18.9316	14.8572	8.55013	13.4823	12.2668	11.9543	14.684	0.001	0.001	0.001	6.14866	9.05538	0.001	fimbrin-4
LOC105039911	0.001	0.001	29.6039	31.497	22.1572	22.2203	0.001	0.001	0.001	0.001	1.56475	0.001	0.001	0.001	uncharacterized protein LOC105039911
LOC105041366	0.392528	3.66383	20.8301	17.3108	15.8237	18.8161	6.5323	6.33939	8.45172	0.001	0.001	3.27236	4.96538	2.49926	uncharacterized protein LOC105041366 isoform X3
LOC105046286	8.74257	13.1147	3.32061	8.97736	8.12347	10.4444	3.53622	6.8974	4.20864	0.001	7.17103	6.07364	0.001	2.31936	uncharacterized protein LOC105046286
LOC105046325	0.79968	1.06631	121.321	25.9313	11.6602	24.3612	0.001	0.001	0.001	0.001	0.001	0.001	0.001	0.001	7-deoxyloganetic acid glucosyltransferase-like
LOC105046326	3.6724	2.44842	60.3772	30.9621	91.3456	83.0835	0.001	16.3613	1.92859	0.001	1.39027	0.001	2.73264	0.001	:UDP-glycosyltransferase 76F1-like
LOC105048991	5.40548	11.2121	5.08391	1.16856	5.66663	3.76699	0.001	0.001	0.001	0.001	0.001	0.910374	0.001	0.637355	protein NUCLEAR FUSION DEFECTIVE 4-like isoform X1
LOC105051077	5.16607	4.76898	6.46873	4.3813	6.8169	4.2727	2.2044	7.52444	2.08693	0.001	0.601765	5.4211	1.77419	11.8077	uncharacterized protein LOC105051077 isoform X2
LOC105055195	0.001	33.8213	24.2872	18.3851	6.3986	1.33684	0.001	0.001	0.001	0.001	0.001	0.001	0.001	0.001	probable flavin-containing monooxygenase 1
LOC105057479	0.001	18.6102	66.7935	46.1628	50.2775	14.3809	0.001	1.55451	1.4659	0.001	4.22693	2.1155	12.4623	1.48106	heparan-alpha-glucosaminide N-acetyltransferase isoform X1
LOC105038868	0.001	15.0458	18.2626	18.3993	18.2501	17.6204	6.70636	2.51356	7.11086	0.001	7.8111	0.488664	1.43935	9.23709	uncharacterized protein LOC105038868
LOC105046387	1.18386	10.2607	12.3333	19.9622	7.10783	7.42507	0.001	29.6681	3.73027	0.001	7.17082	10.7666	19.38	1.88443	delta-1-pyrroline-5-carboxylate synthase
LOC105048945	8.53663	8.70458	9.15499	7.81603	13.7825	6.7489	6.26749	5.59302	0.527422	0.001	13.6874	1.52228	0.74731	0.001	LOW QUALITY PROTEIN: CWF19-like protein 2
LOC105057516	7.06366	13.0414	9.5524	9.51453	9.78691	9.25005	9.04235	7.26233	0.001	0.001	0.001	3.29439	10.5122	0.001	LOW QUALITY PROTEIN: potassium transporter 7-like
